# Supplementary material for: Bio-inspired nacre-like composites with excellent mechanical properties, gas-barrier function and fire-retardant performances based on self-assembly between hyperbranched poly(amido amine)s and montmorillonite
Source: Royal Society of Chemistry journal article supplement (doi:10.1039/d2ra07647k), 2023-01-01
Supplement: d2ra07647k1.pdf [file d2ra07647k1.pdf]

**Bio-inspired nacre-like composites with excellent mechanical properties, gas-barrier function and fire-retardant performances based on self-assembly between hyperbranched poly(amido amine)s and montmorillonite**

Biqiang Jin<sup>a,b</sup>, Hao Wang<sup>a</sup>, Hu Xu<sup>a</sup>, Haitao Wu<sup>a</sup>, Wenqiang Wu<sup>a</sup>, Zhaoyang Yuan<sup>a</sup>, Zhendong Huang<sup>a</sup>, Yinghan Wang<sup>a,\*</sup>, Jinrong Wu<sup>a,\*</sup>

<sup>a</sup>State Key Laboratory of Polymer Materials Engineering, College of Polymer Science and Engineering, Sichuan University, Chengdu 610065, China

<sup>b</sup>College of Science, Xichang University, Xichang 615000, China

Corresponding authors :

Professor Jinrong Wu

E-mail: [wujinrong@scu.edu.cn](mailto:wujinrong@scu.edu.cn)

Professor Yinghan Wang

E-mail: [wang\\_yh@scu.edu.cn](mailto:wang_yh@scu.edu.cn)

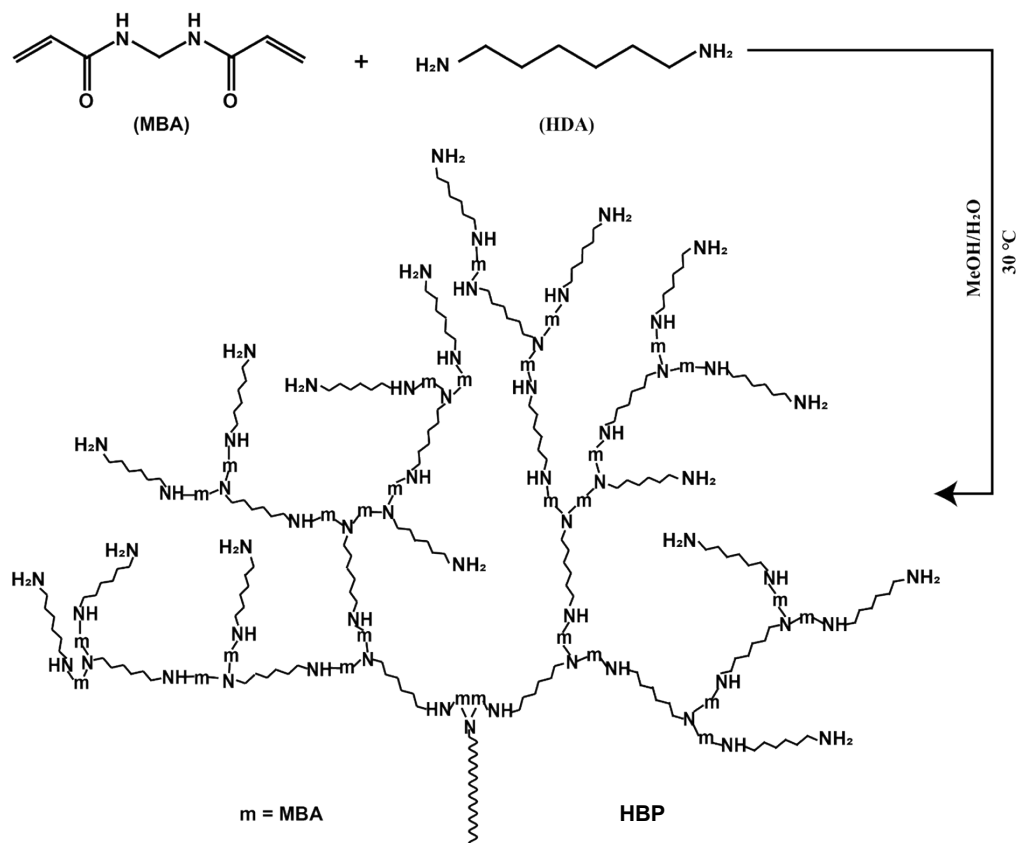

Figure S1 Schematic diagram of the synthesis route of HBP

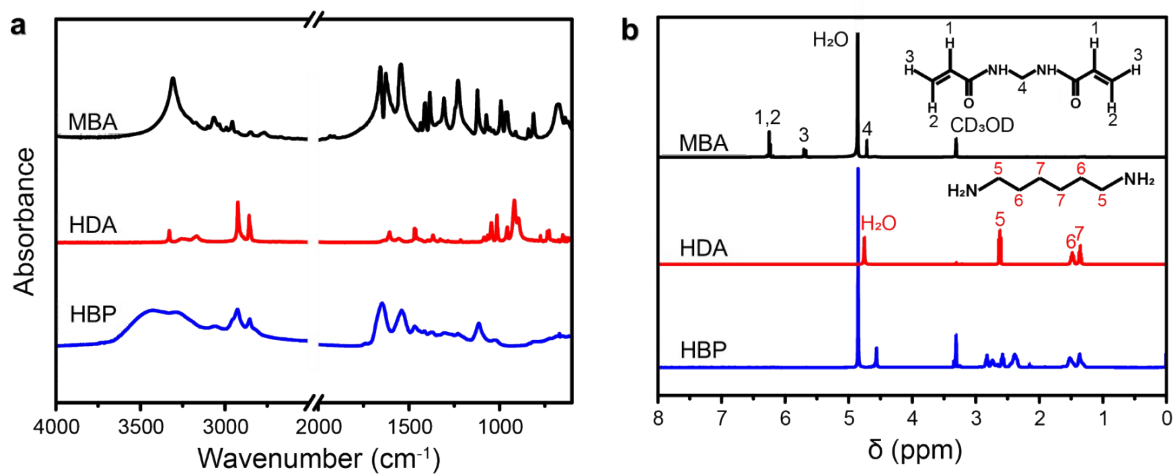

Figure S2 FTIR and NMR analysis of MBA, HDA and HBP

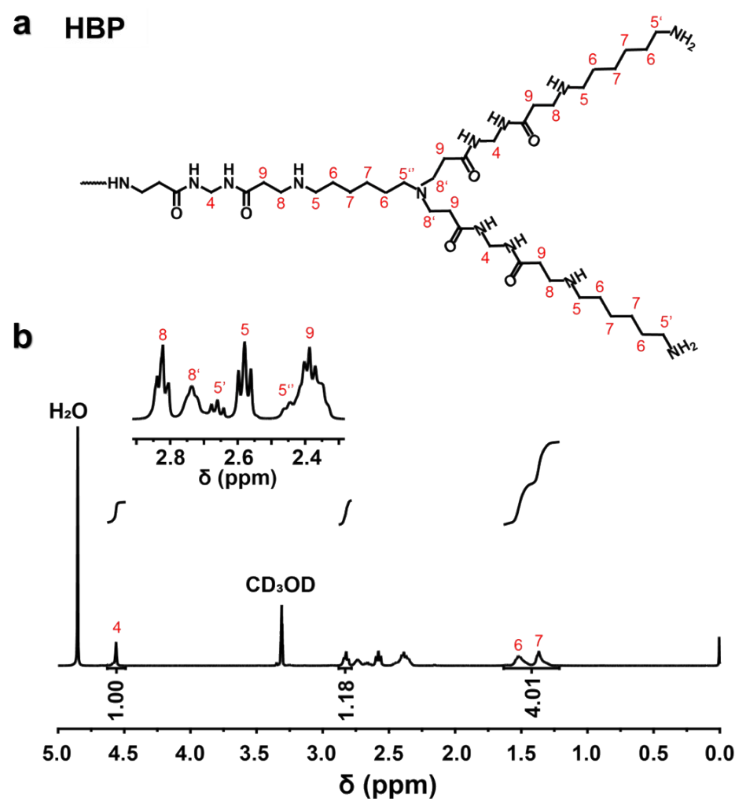

Figure S3 (a) Chemical structure of HBP. (b)  $^1\text{H}$  NMR spectrum of HBP (400 MHz, in  $\text{CD}_3\text{OD}$ ).

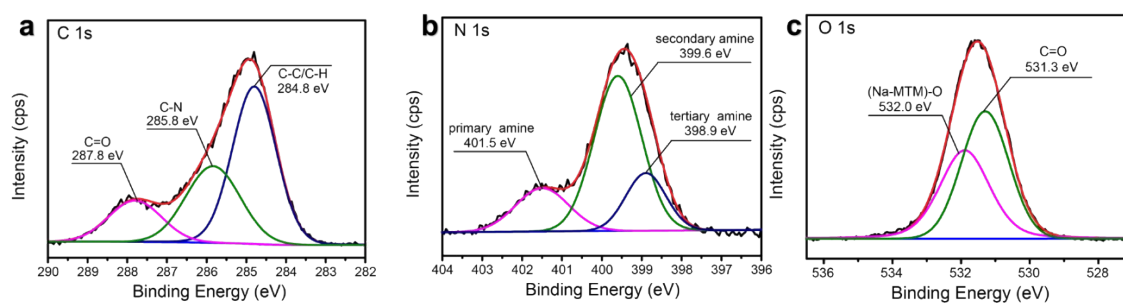

Figure S4 (a) C 1s core-level spectra of Na-MTM/HBP. (c) N 1s core-level spectra of Na-MTM/HBP. (d) O 1s core-level spectra of Na-MTM/HBP.

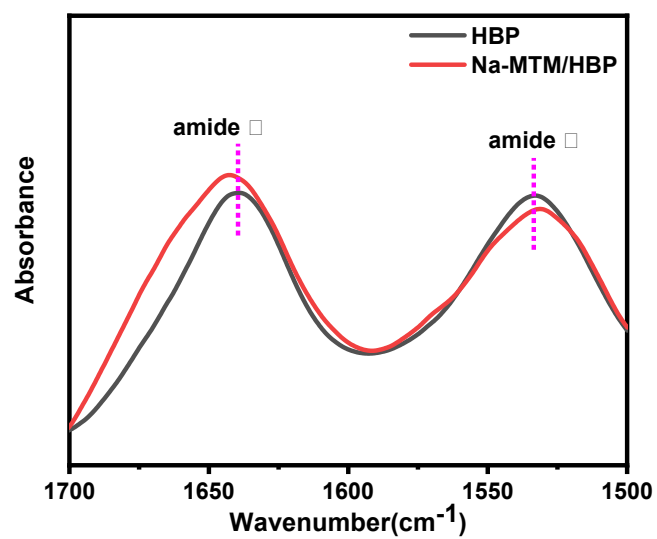

Figure S5 Comparison the position shift of amide I band and the amide II band in HBP and Na-MTM/HBP
